# Supplementary material for: Hybridization Capture Reveals Evolution and Conservation across the Entire Koala Retrovirus Genome
Source: PubMed Central journal article supplement (PMC3994108; doi:10.1371/journal.pone.0095633), 2014-04-21
Supplement: pone.0095633.s001.pdf [file pone.0095633.s001.pdf]

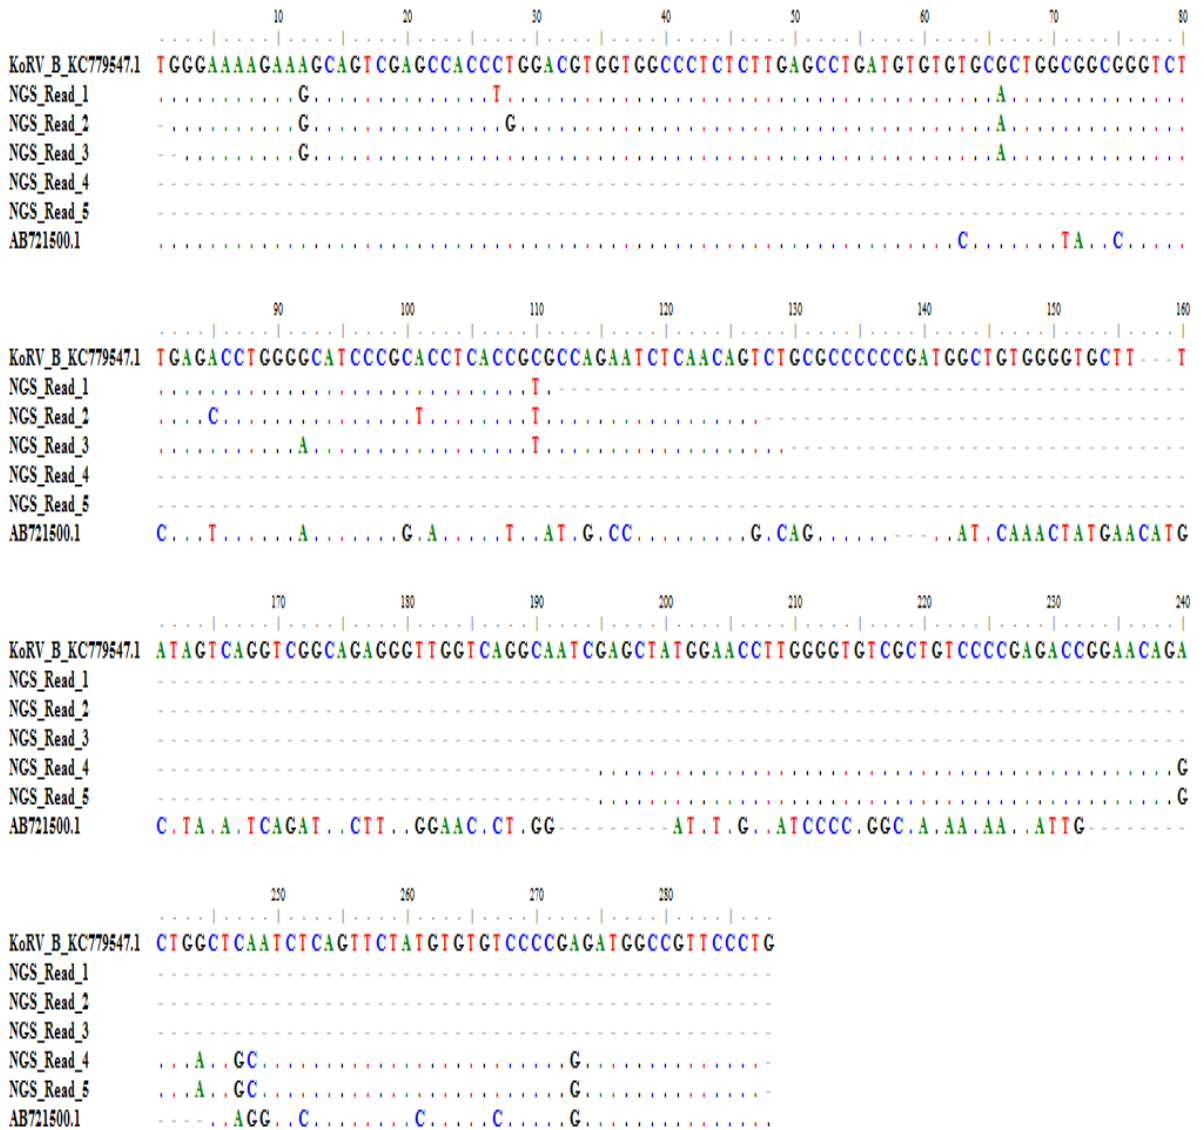

**Fig. S1. Alignment of hybridization capture sequences to koala retrovirus B (KoRV-B) isolate Br2-1CETTg.** KoRV-B sequences are shown and used as a reference. Individual reads from koala Pci-SN265 were aligned with dots indicating a match, dashes indicating indels, and mismatches indicated by the appropriate DNA base. The KoRV-A sequence AB721500 (Shojima et al. 2013) is included to highlight the differences between KoRV-A and KoRV-B. The sequences shown also correspond to positions 6149-6436 of the reference sequence AF151794 (Hanger et al. 2000).
