# Supplementary material for: Hybridization Capture Reveals Evolution and Conservation across the Entire Koala Retrovirus Genome
Source: PubMed Central journal article supplement (PMC3994108; doi:10.1371/journal.pone.0095633), 2014-04-21
Supplement: pone.0095633.s002.pdf [file pone.0095633.s002.pdf]

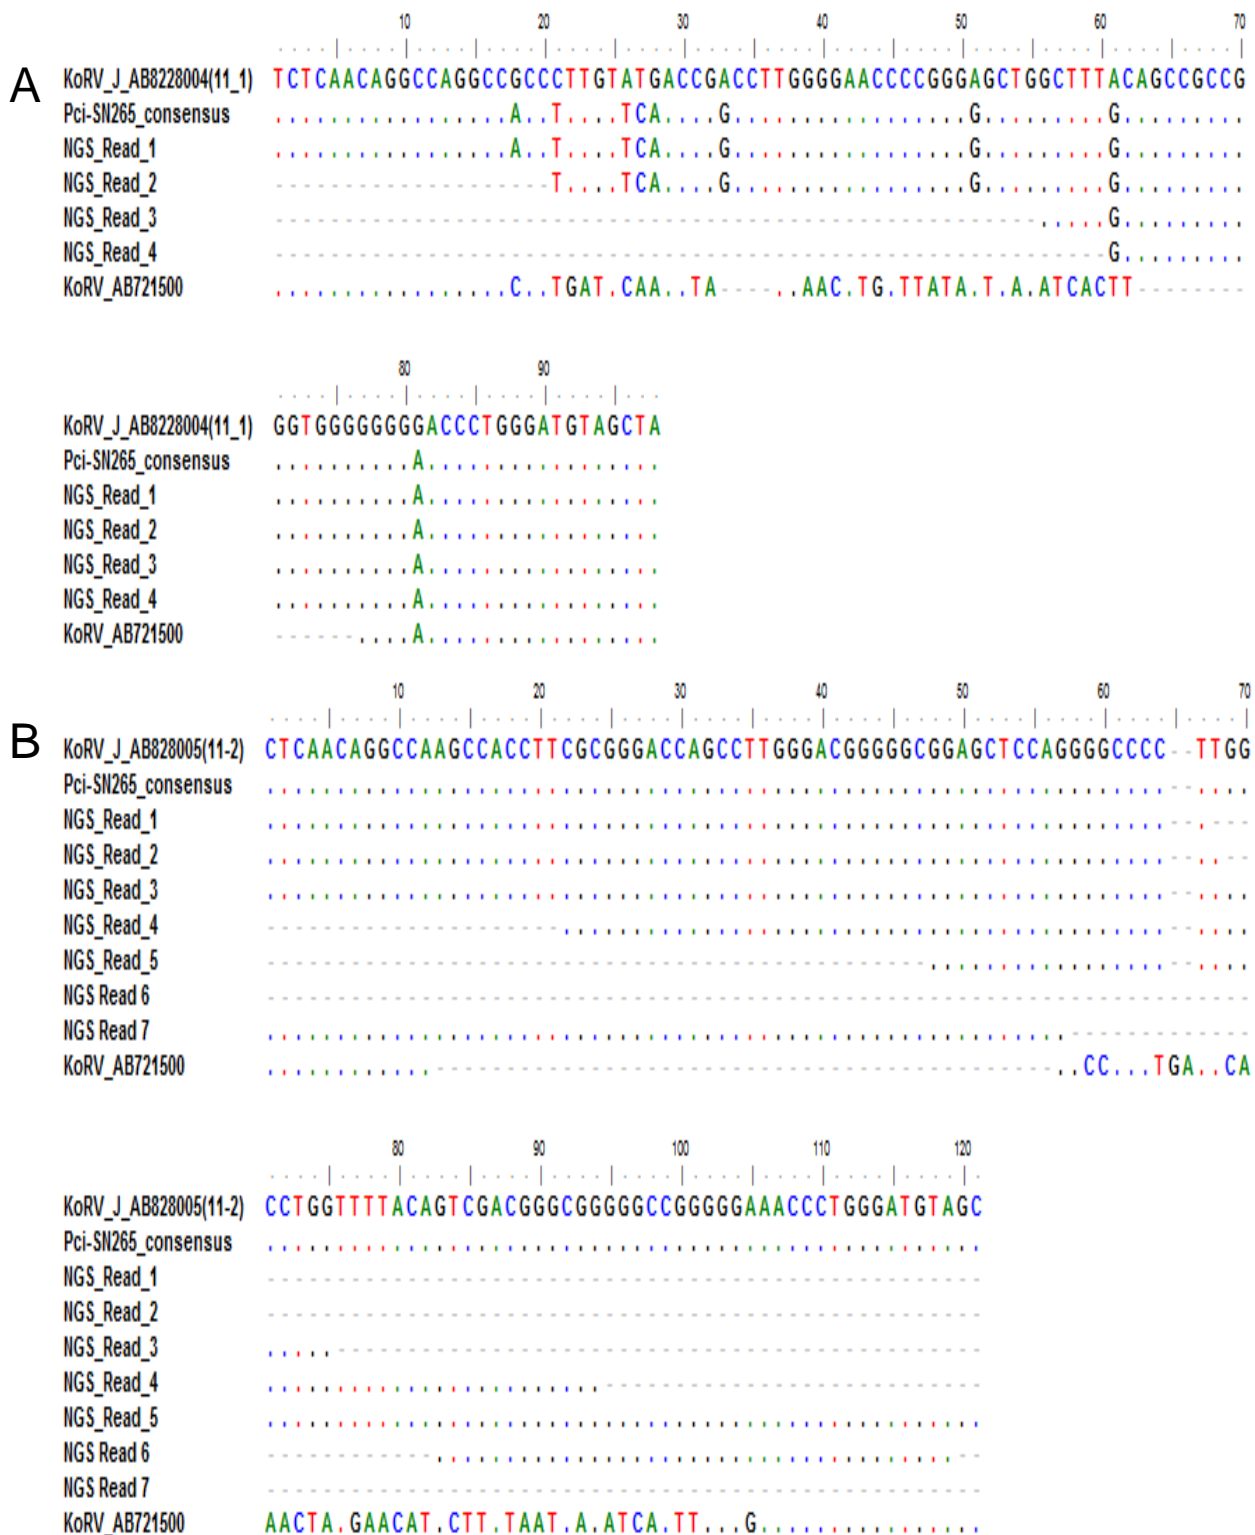

**Fig. S2. Alignment of hybridization capture sequences to KoRV isolates identified in Japanese zoo koalas: clone 11-1 (panel A) and 11-2 (Panel B).** Clone 11-1 and 11-2 sequences correspond respectively to positions 6205-6303 and 6204-6324 of AF151794 (Hanger et al. 2000). The sequence from each clone is shown as the references to which are aligned the Pci-SN265 consensus sequence, as well as individual next-generation reads. The sequence of KoRV AB721500 (Shojima et al. 2013) was also aligned to highlight differences versus the two Japanese isolates. Identity to the reference is indicated by a dot, differences by the corresponding base, and indels by a dash.
