# Supplementary material for: Hybridization Capture Reveals Evolution and Conservation across the Entire Koala Retrovirus Genome
Source: PubMed Central journal article supplement (PMC3994108; doi:10.1371/journal.pone.0095633), 2014-04-21
Supplement: pone.0095633.s007.pdf [file pone.0095633.s007.pdf]

**Table S2: KoRV variable sites in modern and historic koalas**

|            |      |      |      |       |       |      |      |      |       |      |      |         |      |      |       |      |       |      |       |      |
|------------|------|------|------|-------|-------|------|------|------|-------|------|------|---------|------|------|-------|------|-------|------|-------|------|
| Position   | 20   | 70   | 93   | 111   | 136   | 145  | 147  | 157  | 312   | 357  | 470  | 477     | 492  | 495  | 602   | 604  | 783   | 804  | 806   | 827  |
| AF151794   | A    | G    | G    | G     | G     | G    | G    | G    | C     | T    | A    | A       | T    | G    | G     | C    | T     | T    | C     | G    |
| AB721500   | A    | G    | G    | G     | G     | A    | A    | G    | T     | C    | A    | A       | T    | G    | G     | C    | C     | T    | T     | G    |
| Vienna Zoo | A    | G    | G/A  | G     | G     | G/A  | G/A  | G/A  | T     | C    | A    | A/T     | C/T  | G/A  | G     | C    | C/T   | C/T  | T     | G/A  |
| QMJ6480    | A    | G    | G/A  | G/A   | G     | G/A  | G/A  | G/A  | T     | C    | A    | A/T     | T    | G    | G     | C    | C/T   | C/T  | T     | G/A  |
| 521198     | A    | G    | G/A  | G     | G     | G/A  | G/A  | G    | T     | C/T  | A    | A/T     | T    | G    | G     | C    | C/T   | T    | C/T   | G/A  |
| MCZ12454   | A    | G    | G/A  | G     | G/A   | G/A  | G/A  | G    | T     | C/T  | A    | A/T/G   | C/T  | G    | C/G   | C    | C/T   | T    | T     | G/A  |
| MCZ8574    | A    | G    | G/A  | G     | G/A   | G/A  | G/A  | G    | T     | C    | G/A  | A/T     | T    | G    | G     | C    | C/T   | T    | T/A   | G/A  |
| um3435     | A    | G    | G/A  | G     | G     | G/A  | G/A  | G    | T     | C/T  | A    | A/T     | T    | G    | G     | C    | C/T   | T    | T     | G/A  |
| maex1738   | G/A  | G/A  | G/A  | G     | G     | G/A  | G/A  | G    | T     | C    | A    | A/T     | T    | G    | C/G   | C    | C/T   | T    | T     | G/A  |
| Amino Acid | -    | -    | -    | -     | -     | -    | -    | -    | -     | -    | -    | -       | -    | -    | -     | -    | -     | -    | -     | -    |
| Position   | 866  | 874  | 900  | 909   | 910   | 916  | 964  | 991  | 1002  | 1065 | 1067 | 1108    | 1113 | 1197 | 1263  | 1301 | 1325  | 1404 | 1689  | 1809 |
| AF151794   | G    | A    | T    | C     | C     | A    | C    | C    | T     | G    | G    | A       | G    | G    | C     | G    | C     | G    | T     | A    |
| AB721500   | G    | A    | T    | C     | C     | A    | A    | C    | T     | G    | G    | A       | G    | G    | C     | G    | C     | G    | C     | G    |
| Vienna Zoo | G    | A    | A/T  | C/T   | C/T   | A    | A/C  | C    | T     | G    | G    | A/G     | G    | G/A  | C/T   | G    | C     | G/A  | T/C   | A/G  |
| QMJ6480    | G    | A    | T    | C/T/G | C/T/G | A    | A/C  | C    | T     | G    | G    | A/G     | G/A  | G    | C     | G/A  | C     | G    | T/C   | A/G  |
| 521198     | G    | A    | T    | C/T   | C/T   | A    | A/C  | C    | T     | G    | G    | A/G     | G    | G/A  | C/T   | G    | C     | G    | T/C   | A/G  |
| MCZ12454   | G    | A    | T    | C/T   | C/T   | A    | A/C  | C    | T/C   | G    | G    | A/G     | G    | G    | C     | G    | C     | G/A  | T/C   | A/G  |
| MCZ8574    | G    | A    | T    | C/T   | C/T   | A/T  | C    | C    | T     | G/A  | G    | A/G     | G    | G    | C     | G    | C     | G/A  | T/C   | A/G  |
| um3435     | G/T  | G/A  | T    | C/T   | C/T   | A    | A/C  | C/T  | T     | G    | G    | A/G     | G    | G    | C     | G    | C     | G    | T/C   | A/G  |
| maex1738   | G    | A    | T    | C/T   | C/T   | A/T  | A/C  | C    | T     | G    | G/A  | A/G     | G    | G    | C     | G    | C/G   | G    | T/C   | A/G  |
| Amino Acid | -    | -    | -    | -     | -     | -    | -    | -    | -     | -    | -    | E/K     | V    | P    | P     | G/E  | P/R   | T    | L     | K    |
| Position   | 1993 | 2019 | 2130 | 2133  | 2154  | 2166 | 2229 | 2230 | 2240  | 2244 | 2245 | 2248    | 2254 | 2261 | 2263  | 2276 | 2360  | 2412 | 2665  | 2704 |
| AF151794   | G    | A    | G    | G     | G     | T    | A    | C    | G     | G    | G    | C       | G    | G    | C     | T    | G     | T    | G     |      |
| AB721500   | G    | C    | A    | G     | G     | A    | T    | A    | C     | G    | G    | C       | G    | G    | C     | C    | G     | C    | G     |      |
| Vienna Zoo | G    | A/C  | A    | G/A   | G     | G/A  | T    | A    | C     | G    | G    | C       | G    | G    | C     | C    | G     | C/T  | G/A   |      |
| QMJ6480    | G    | A/C  | A    | G     | G     | G/A  | T    | A    | C/G   | G    | G    | C       | G    | G    | C     | C    | G     | C    | G/A   |      |
| 521198     | G    | A/C  | A    | G     | G     | G/A  | T    | A    | C/G   | G/A  | G    | G       | A/C  | G    | C     | C    | G     | C    | G     |      |
| MCZ12454   | G/A  | A/C  | G/A  | G     | G/A   | G/A  | T    | A    | C/G   | G    | G/A  | A/C     | G    | G/A  | C     | C    | G     | C    | G     |      |
| MCZ8574    | G    | A/C  | A    | G     | G     | G/A  | T    | A/G  | C/G/A | G    | G    | A/C     | G    | G    | C     | C/A  | G     | C/A  | G     |      |
| um3435     | G    | A/C  | G/A  | G     | G     | G/A  | A/T  | A    | C/G/A | G    | G/A  | A/C     | G    | G    | C     | C    | G     | C    | G     |      |
| maex1738   | G    | A/C  | A    | G     | G     | G/A  | T    | A/G  | C/G   | G    | G    | A/C     | G/A  | G/A  | C     | C/T  | G/A   | C    | G/A   |      |
| Amino Acid | V/I  | T    | G    | Q     | K     | R    | H/Q  | K/E  | T/R/K | E    | E/K  | E/K     | Q/K  | K/R  | E/K   | T/I  | S/T/Y | R    | S/T/P | V/I  |
| Position   | 2880 | 2922 | 2926 | 3020  | 3069  | 3235 | 3306 | 3336 | 3572  | 3672 | 3717 | 3719    | 3736 | 3810 | 3836  | 4212 | 4485  | 4675 | 4702  | 4725 |
| AF151794   | C    | A    | G    | T     | T     | G    | G    | C    | C     | G    | G    | C       | A    | T    | C     | A    | T     | G    | A     |      |
| AB721500   | C    | A    | G    | T     | T     | G    | G    | C    | C     | G    | G    | C       | A    | T    | T     | A    | T     | G    | G     |      |
| Vienna Zoo | C/T  | G/A  | G    | T/C   | T     | G    | G    | C/T  | C     | C    | G    | C       | G/A  | T    | T     | A/G  | T     | G    | A/G   |      |
| QMJ6480    | C/T  | G/A  | G    | T/C   | T     | G    | G    | C    | C     | C    | G    | C       | A    | T    | T/A   | A/G  | T     | G    | A/G   |      |
| 521198     | C/T  | G/A  | G    | T/C   | T     | G    | G    | C    | C/A   | C    | G    | C       | A    | T    | T     | A/G  | T     | G    | A/G   |      |
| MCZ12454   | C/T  | A    | G    | T/C   | T/C   | G/A  | G/T  | C    | C     | C    | G    | C       | A    | T    | T     | A    | T     | G    | A/G   |      |
| MCZ8574    | C    | G/A  | G    | T/C   | T     | G    | G    | C    | C     | C    | G    | C/T     | A    | T    | T/C   | A    | T     | G/T  | A/G   |      |
| um3435     | C/T  | G/A  | G    | T/C   | T     | G    | G    | C/T  | C     | C/T  | G    | C       | A    | T    | T/A   | A/G  | T/A   | G    | A/G   |      |
| maex1738   | C/T  | G/A  | G/A  | T/C   | T     | G    | G/T  | C    | C     | C    | G/A  | G/A     | C    | A    | T/A   | T/C  | A/G   | T    | G     | A/G  |
| Amino Acid | P    | L    | E/K  | A/V   | V     | E/K  | P    | D    | A     | C    | K    | R       | R/*  | G    | F/Y   | S/R  | R     | Y    | A/S   | K    |
| Position   | 4940 | 4960 | 5004 | 5113  | 5133  | 5134 | 5179 | 5207 | 5227  | 5419 | 5446 | 5465    | 5639 | 5646 | 5690  | 6138 | 6157  | 6353 | 6474  | 6541 |
| AF151794   | G    | G    | G    | G     | G     | C    | G    | G    | C     | G    | C    | T       | C    | G    | C     | C    | C     | T    | G     | C    |
| AB721500   | G    | G    | A    | A     | A     | T    | G    | G    | C     | A    | C    | T       | C    | G    | C     | C    | C     | T    | G     | C    |
| Vienna Zoo | G/A  | G/A  | G/A  | G/A   | G/A   | T    | G    | G    | C     | G/A  | C    | T       | C/T  | G/A  | C     | C    | C/T   | T/C  | G/A   | C    |
| QMJ6480    | G/A  | G/A  | G/A  | G/A   | G/A   | C/T  | G/A  | G    | C     | G/A  | C    | T       | C/T  | G    | C     | C    | C/T   | T    | G/A   | C/T  |
| 521198     | G/A  | G/A  | G/A  | G/A   | G/A   | C/T  | G    | G    | C     | G/A  | C    | T       | C    | G/A  | C     | C    | C/T   | T    | G     | C    |
| MCZ12454   | G/A  | G/A  | A    | G/A   | G/A   | T/G  | G    | G    | C     | G/A  | C    | T       | C    | G    | C/T   | C/T  | C/T   | T    | G/A   | C    |
| MCZ8574    | G/A  | G/A  | A    | G/A   | G/A   | T/G  | G    | G    | C     | G/A  | C    | T       | C    | G    | C     | C    | C/T   | T    | G     | C    |
| um3435     | G/A  | G/A  | G/A  | G/A   | G/A   | C/T  | G    | G/A  | C/A   | G/A  | C    | T/A     | C    | G    | C     | C    | C/T   | T    | G     | C    |
| maex1738   | G/A  | G/A  | G/A  | G/A   | G/A   | T/A  | G    | G    | C     | G/A  | C/A  | T       | C    | G    | C     | C    | C/T   | T    | G     | C    |
| Amino Acid | R/K  | R/G  | G    | A/T   | E     | P/S  | V/I  | R/Q  | L/I   | N/D  | P/T  | V/E     | A/V  | G    | T/I   | S/F  | C     | S/P  | G/D   | T    |
| Position   | 6554 | 6579 | 6710 | 6717  | 6765  | 6779 | 6922 | 6964 | 6993  | 7046 | 7097 | 7137    | 7140 | 7287 | 7289  | 7336 | 7381  | 7891 | 7925  | 7933 |
| AF151794   | C    | G    | A    | C     | C     | C    | T    | T    | G     | G    | A    | G       | A    | T    | C     | A    | T     | C    | G     | G    |
| AB721500   | C    | G    | A    | C     | C     | C    | T    | T    | G     | G    | A    | G       | A    | C    | C     | A    | T     | G    | G     |      |
| Vienna Zoo | C    | G    | A/G  | C     | C/T   | C    | T/C  | T    | G     | G    | A    | A       | G    | A    | C     | A/G  | T/C   | G    | G     |      |
| QMJ6480    | C    | G    | A/G  | C/T   | C     | C    | T/C  | T    | G/A   | G    | A    | A       | G/A  | A    | T/C   | C    | A     | T/C  | G     |      |
| 521198     | C    | G    | A/G  | C     | C/T   | C    | T/C  | T/A  | G     | G    | A    | A       | G    | A    | T/C/A | C    | A     | T/C  | G/A   |      |
| MCZ12454   | C/T  | G    | A/G  | C     | C     | C    | T/C  | T    | G/A   | G    | A    | A       | G    | A/T  | C     | C/T  | A     | T/C  | G     |      |
| MCZ8574    | C    | G    | A/G  | C     | C/T   | C/T  | T/C  | T    | G     | G/A  | A/G  | A/C     | G    | A    | C     | C    | A     | T/C  | G/A   |      |
| um3435     | C    | G/A  | A/G  | C     | C     | C    | T/C  | T/A  | G     | G    | A    | A/C     | G    | A    | T/C   | C    | A     | T/C  | G     |      |
| maex1738   | C    | G    | A/G  | C     | C     | C    | T/C  | T/A  | G/A   | G    | A    | A/T     | G    | A/T  | T/C   | C    | A     | T/C  | G     |      |
| Amino Acid | R/W  | R/Q  | K/E  | P/L   | P/L   | Q/*  | P    | Y/*  | G/E   | G/R  | N/D  | R/H/P/K | S/N  | H/P  | P/S   | L    | L     | L    | -     | -    |
| Position   | 7938 | 8071 | 8076 | 8080  | 8091  | 8092 | 8405 | 8410 | 8412  | 8426 | 8430 | 8439    | 8440 |      |       |      |       |      |       |      |
| AF151794   | T    | G    | A    | G     | G     | T    | A    | A    | A     | G    | A    | T       |      |      |       |      |       |      |       |      |
| AB721500   | T    | G    | A    | G     | G     | T    | G    | A    | A     | G    | A    | T       |      |      |       |      |       |      |       |      |
| Vienna Zoo | T    | G/A  | A/G  | G/A   | G/A   | G    | T/C  | A/G  | A/T   | A/T  | G/A  | A       | T/A  |      |       |      |       |      |       |      |
| QMJ6480    | T    | G    | A/G  | G/A   | G     | G/A  | T/C  | G    | A/T   | A    | G    | A       | T/G  |      |       |      |       |      |       |      |
| 521198     | T    | G    | A/G  | G/A   | G     | G    | T/C  | A/G  | A/T   | A    | G    | A       | T/A  |      |       |      |       |      |       |      |
| MCZ12454   | T    | G    | A/G  | G/A   | G     | G    | T/C  | A/G  | A/T   | A    | G    | A       | T/C  |      |       |      |       |      |       |      |
| MCZ8574    | T    | G    | A/G  | G/A   | G     | G    | T/C  | A/G  | A/T   | A    | G    | A       | T    |      |       |      |       |      |       |      |
| um3435     | T    | G    | A/G  | G/A   | G     | G    | T/C  | G    | A/T   | A    | G    | A       | T/A  |      |       |      |       |      |       |      |
| maex1738   | T/G  | G    | A/G  | G/A   | G     | G    | T/C  | G    | A/T   | A    | G    | A       | T    |      |       |      |       |      |       |      |
| Amino Acid | -    | -    | -    | -     | -     | -    | -    | -    | -     | -    | -    | -       | -    |      |       |      |       |      |       |      |

-Non coding regions

Position numbers follow those of the KoRV reference genome, GenBank accession AF151794

The first two sequences are from Genbank; the "Vienna Zoo" koala is PCI-SN265; for other koala specimens see Table 1

Variation present in more than two koalas (shared)

Variation present in one koala (private)

Fixed difference

The first amino acid corresponds to AF151794; the second or subsequent amino acids are in order of appearance in the rows. Asterisk (\*) indicates a stop codon
