# Supplementary material for: Hybridization Capture Reveals Evolution and Conservation across the Entire Koala Retrovirus Genome
Source: PubMed Central journal article supplement (PMC3994108; doi:10.1371/journal.pone.0095633), 2014-04-21
Supplement: pone.0095633.s009.pdf [file pone.0095633.s009.pdf]

**Table S4. Estimates of Tajima's D\***

|            | <b>m</b> | <b>S</b> | <b>ps</b> | <b>Θ</b> | <b>π</b> | <b>D</b>  |
|------------|----------|----------|-----------|----------|----------|-----------|
| <i>gag</i> | 16       | 34       | 0,02175   | 0,00656  | 0,00545  | -0,699737 |
| <i>pol</i> | 16       | 37       | 0,01095   | 0,0033   | 0,0031   | -0,253388 |
| <i>env</i> | 16       | 22       | 0,01116   | 0,00336  | 0,00304  | -0,390221 |

\*All positions containing gaps or missing data were eliminated. There were 1563 positions for gag, 3378 for pol, and 1971 for env in the final dataset.

Abbreviations: m = number of sequences; S = Number of segregating sites; ps = S/m;  $\Theta$  = ps/a1;  $\pi$  = nucleotide diversity  
D is the Tajima test statistic
