# Supplementary material for: Hybridization Capture Reveals Evolution and Conservation across the Entire Koala Retrovirus Genome
Source: PubMed Central journal article supplement (PMC3994108; doi:10.1371/journal.pone.0095633), 2014-04-21
Supplement: pone.0095633.s010.pdf [file pone.0095633.s010.pdf]

**Table S5. Codon based Z tests of selection**

| <i>gag</i> (521 codons)  | 1     | 2      | 3      | 4      | 5      | 6      | 7      | 8      | 9      | 10     | 11     | 12     | 13     | 14     | 15     | 16     |
|--------------------------|-------|--------|--------|--------|--------|--------|--------|--------|--------|--------|--------|--------|--------|--------|--------|--------|
| Pci_SN265                |       | 0      | 0      | -1,049 | -0,65  | -0,662 | -1,015 | -0,677 | -1,817 | -2,716 | -1,775 | -2,011 | -2,221 | -2,138 | -0,794 | -1,318 |
| Pci_QMJ6480              | 1     |        | 0      | -1,049 | -0,65  | -0,662 | -1,015 | -0,677 | -1,817 | -2,716 | -1,775 | -2,011 | -2,221 | -2,138 | -0,794 | -1,318 |
| Pci_582119               | 1     | 1      |        | -1,049 | -0,65  | -0,662 | -1,015 | -0,677 | -1,817 | -2,716 | -1,775 | -2,011 | -2,221 | -2,138 | -0,794 | -1,318 |
| Pci_MCZ_12454            | 0,296 | 0,296  | 0,296  |        | -1,17  | 0,988  | -1,499 | 1,017  | -2,068 | -2,902 | -2,002 | -2,24  | -2,425 | -2,327 | -1,14  | -1,584 |
| Pci_MCZ8574              | 0,517 | 0,517  | 0,517  | 0,244  |        | -1,456 | -1,145 | -0,939 | -1,856 | -2,751 | -1,998 | -2,219 | -2,411 | -2,086 | -1,269 | -1,577 |
| Pci_um3435               | 0,509 | 0,509  | 0,509  | 0,325  | 0,148  |        | -1,218 | 1,441  | -1,886 | -2,749 | -2,004 | -2,242 | -2,427 | -2,484 | -1,298 | -1,586 |
| Pci_maex1738             | 0,312 | 0,312  | 0,312  | 0,137  | 0,254  | 0,225  |        | -1,225 | -2,099 | -2,914 | -2,023 | -2,249 | -2,464 | -2,373 | -1,153 | -1,003 |
| 1Pci_SN265               | 0,5   | 0,5    | 0,5    | 0,311  | 0,35   | 0,152  | 0,223  |        | -1,91  | -2,787 | -1,88  | -2,106 | -2,315 | -2,211 | -1,001 | -1,462 |
| 1Pci_QMJ6480             | 0,072 | 0,072  | 0,072  | 0,041  | 0,066  | 0,062  | 0,038  | 0,059  |        | -2,09  | -0,682 | -0,948 | -1,331 | -1,154 | 2,63   | 0,173  |
| 1Pci_582119              | 0,008 | 0,008  | 0,008  | 0,004  | 0,007  | 0,007  | 0,004  | 0,006  | 0,039  |        | -2,026 | -0,913 | -1,306 | -1,793 | -0,989 | -1,489 |
| 1Pci_MCZ_12454           | 0,078 | 0,078  | 0,078  | 0,048  | 0,048  | 0,047  | 0,045  | 0,063  | 0,496  | 0,045  |        | -1,624 | -1,837 | -1,55  | 0,421  | -0,688 |
| 1Pci_MCZ8574             | 0,047 | 0,047  | 0,047  | 0,027  | 0,028  | 0,027  | 0,026  | 0,037  | 0,345  | 0,363  | 0,107  |        | -1,565 | -1,94  | -0,249 | -1,165 |
| 1Pci_um3435              | 0,028 | 0,028  | 0,028  | 0,017  | 0,017  | 0,017  | 0,015  | 0,022  | 0,186  | 0,194  | 0,069  | 0,12   |        | -1,655 | -1,46  | -1,728 |
| 1Pci_maex1738            | 0,035 | 0,035  | 0,035  | 0,022  | 0,039  | 0,014  | 0,019  | 0,029  | 0,251  | 0,076  | 0,124  | 0,055  | 0,1    |        | -0,766 | -1,488 |
| KoRV_AF151794.2_Hanger   | 0,429 | 0,429  | 0,429  | 0,256  | 0,207  | 0,197  | 0,251  | 0,319  | 0,01   | 0,324  | 0,675  | 0,804  | 0,147  | 0,445  |        | 0,74   |
| KoRV_AB721500            | 0,19  | 0,19   | 0,19   | 0,116  | 0,117  | 0,115  | 0,318  | 0,146  | 0,863  | 0,139  | 0,493  | 0,246  | 0,087  | 0,139  | 0,461  |        |
| <i>pol</i> (1126 codons) |       |        |        |        |        |        |        |        |        |        |        |        |        |        |        |        |
| Pci_SN265                |       | -0,293 | -0,293 | -0,618 | -0,618 | -1,161 | -0,618 | -1,175 | -1,461 | -1,828 | -1,422 | -1,924 | -1,202 | -0,277 | -1,906 | -1,681 |
| Pci_QMJ6480              | 0,77  |        | 0      | 1,023  | 1,47   | -0,614 | 1,023  | -0,657 | -1,137 | -2,017 | -1,146 | -1,707 | -0,989 | 0,013  | -1,66  | -1,431 |
| Pci_582119               | 0,77  | 1      |        | 1,023  | 1,47   | -0,614 | 1,023  | -0,657 | -1,137 | -2,017 | -1,146 | -1,707 | -0,989 | 0,013  | -1,66  | -1,431 |
| Pci_MCZ_12454            | 0,538 | 0,308  | 0,308  |        | 1,03   | -0,283 | 0      | -0,308 | -1,344 | -2,142 | -1,294 | -1,85  | -0,989 | 0,013  | -1,791 | -1,564 |
| Pci_MCZ8574              | 0,538 | 0,144  | 0,144  | 0,305  |        | -0,283 | 1,03   | -0,308 | -1,13  | -2,007 | -1,153 | -1,712 | -0,847 | 0,18   | -1,671 | -1,444 |
| Pci_um3435               | 0,248 | 0,541  | 0,541  | 0,778  | 0,778  |        | -0,283 | -1,342 | -1,322 | -1,886 | -1,009 | -1,573 | -0,847 | -0,285 | -1,542 | -1,314 |
| Pci_maex1738             | 0,538 | 0,308  | 0,308  | 1      | 0,305  | 0,778  |        | -0,308 | -1,344 | -2,142 | -1,294 | -1,85  | -0,989 | 0,013  | -1,791 | -1,564 |
| 1Pci_SN265               | 0,242 | 0,513  | 0,513  | 0,759  | 0,759  | 0,182  | 0,759  |        | -1,323 | -2,092 | -1,284 | -1,816 | -1,18  | -0,292 | -1,772 | -1,548 |
| 1Pci_QMJ6480             | 0,147 | 0,258  | 0,258  | 0,182  | 0,261  | 0,189  | 0,182  | 0,188  |        | -1,68  | -0,514 | -1,269 | -0,977 | 0,193  | -1,239 | -0,95  |
| 1Pci_582119              | 0,07  | 0,046  | 0,046  | 0,034  | 0,047  | 0,062  | 0,034  | 0,039  | 0,096  |        | -1,473 | -0,635 | -2,112 | -1,556 | -0,715 | -1,35  |
| 1Pci_MCZ_12454           | 0,158 | 0,254  | 0,254  | 0,198  | 0,251  | 0,315  | 0,198  | 0,202  | 0,608  | 0,143  |        | 0,286  | -1,232 | -0,333 | 0,009  | 0,011  |
| 1Pci_MCZ8574             | 0,057 | 0,09   | 0,09   | 0,067  | 0,089  | 0,118  | 0,067  | 0,072  | 0,207  | 0,527  | 0,775  |        | -1,841 | -1,126 | -0,962 | -0,496 |
| 1Pci_um3435              | 0,232 | 0,324  | 0,324  | 0,324  | 0,399  | 0,399  | 0,324  | 0,24   | 0,331  | 0,037  | 0,22   | 0,068  |        | -1,132 | -1,822 | -0,937 |
| 1Pci_maex1738            | 0,782 | 0,989  | 0,989  | 0,989  | 0,858  | 0,776  | 0,989  | 0,771  | 0,848  | 0,122  | 0,74   | 0,263  | 0,26   |        | -1,121 | -0,818 |
| KoRV_AF151794.2_Hanger   | 0,059 | 0,1    | 0,1    | 0,076  | 0,097  | 0,126  | 0,076  | 0,079  | 0,218  | 0,476  | 0,993  | 0,338  | 0,071  | 0,264  |        | -0,607 |
| KoRV_AB721500            | 0,095 | 0,155  | 0,155  | 0,12   | 0,151  | 0,191  | 0,12   | 0,124  | 0,344  | 0,18   | 0,992  | 0,621  | 0,351  | 0,415  | 0,545  |        |
| <i>env</i> (657 codons)  |       |        |        |        |        |        |        |        |        |        |        |        |        |        |        |        |
| Pci_SN265                |       | -0,202 | 0,012  | 0,012  | 0,583  | 0,584  | 0,018  | -1,29  | -1,108 | -1,108 | -1,102 | -1,29  | -1,108 | -1,436 | -0,923 | -1,29  |
| Pci_QMJ6480              | 0,84  |        | 0,834  | -0,2   | 1,354  | 0,861  | -0,199 | -1,089 | -0,912 | -0,912 | -0,913 | -1,089 | -0,912 | -1,24  | -0,743 | -1,089 |
| Pci_582119               | 0,991 | 0,406  |        | 0,992  | 2,165  | 2,142  | 0,582  | -1,12  | -1,12  | -1,12  | -0,905 | -1,12  | -1,12  | -1,477 | -0,899 | -1,12  |
| Pci_MCZ_12454            | 0,991 | 0,841  | 0,323  |        | 1,434  | 1,011  | -0,422 | -0,9   | -0,737 | -0,737 | -1,068 | -0,9   | -0,737 | -1,089 | -0,573 | -0,9   |
| Pci_MCZ8574              | 0,561 | 0,178  | 0,032  | 0,154  |        | 2,052  | 0,565  | -0,698 | -0,511 | -0,511 | -0,509 | -0,698 | -0,511 | -0,919 | -0,51  | -0,698 |
| Pci_um3435               | 0,56  | 0,391  | 0,034  | 0,314  | 0,042  |        | 0,013  | -1,091 | -0,888 | -0,888 | -0,886 | -1,091 | -0,888 | -1,266 | -0,887 | -1,091 |
| Pci_maex1738             | 0,986 | 0,843  | 0,562  | 0,674  | 0,573  | 0,99   |        | -1,273 | -1,099 | -1,099 | -1,085 | -1,273 | -1,099 | -0,699 | -1,098 | -1,273 |
| 1Pci_SN265               | 0,199 | 0,278  | 0,265  | 0,37   | 0,486  | 0,277  | 0,205  |        | 1,02   | 1,02   | 1,036  | 0      | 1,02   | -0,664 | 1,449  | 0      |
| 1Pci_QMJ6480             | 0,27  | 0,364  | 0,265  | 0,463  | 0,61   | 0,376  | 0,274  | 0,31   |        | 0      | 1,38   | 1,02   | 0      | -1,045 | 1,067  | 1,02   |
| 1Pci_582119              | 0,27  | 0,364  | 0,265  | 0,463  | 0,61   | 0,376  | 0,274  | 0,31   | 1      |        | 1,38   | 1,02   | 0      | -1,045 | 1,067  | 1,02   |
| 1Pci_MCZ_12454           | 0,272 | 0,363  | 0,367  | 0,288  | 0,612  | 0,378  | 0,28   | 0,302  | 0,17   | 0,17   |        | 1,036  | 1,38   | -0,3   | 1,723  | 1,036  |
| 1Pci_MCZ8574             | 0,199 | 0,278  | 0,265  | 0,37   | 0,486  | 0,277  | 0,205  | 1      | 0,31   | 0,31   | 0,302  |        | 1,02   | -0,664 | 1,449  | 0      |
| 1Pci_um3435              | 0,27  | 0,364  | 0,265  | 0,463  | 0,61   | 0,376  | 0,274  | 0,31   | 1      | 1      | 0,17   | 0,31   |        | -1,045 | 1,067  | 1,02   |
| 1Pci_maex1738            | 0,154 | 0,217  | 0,142  | 0,278  | 0,36   | 0,208  | 0,486  | 0,508  | 0,298  | 0,298  | 0,765  | 0,508  | 0,298  |        | -0,651 | -0,664 |
| KoRV_AF151794.2_Hanger   | 0,358 | 0,459  | 0,37   | 0,568  | 0,611  | 0,377  | 0,275  | 0,15   | 0,288  | 0,288  | 0,088  | 0,15   | 0,288  | 0,516  |        | 1,449  |
| KoRV_AB721500            | 0,199 | 0,278  | 0,265  | 0,37   | 0,486  | 0,277  | 0,205  | 1      | 0,31   | 0,31   | 0,302  | 1      | 0,31   | 0,508  | 0,15   |        |

The test statistic dN-dS is shown above the diagonal. dN and dS are the values of non-synonymous and synonymous substitutions per site, respectively. The Nei-Gojombori method was used to calculate synonymous and nonsynonymous substitutions.

The probability of rejecting the null hypothesis of strict-neutrality (dN = dS) is shown below the diagonal. Values of P less than 0.05 are highlighted in gray. The variance of the difference was computed using the bootstrap method (500 replicates). Numbers listed for columns represent the same KoRV sequences numbered in the rows. The last two KoRV sequences are from GenBank; the other KoRVs are sequences from the current study.
