# Supplementary material for: Hybridization Capture Reveals Evolution and Conservation across the Entire Koala Retrovirus Genome
Source: PubMed Central journal article supplement (PMC3994108; doi:10.1371/journal.pone.0095633), 2014-04-21
Supplement: pone.0095633.s011.pdf [file pone.0095633.s011.pdf]

**Table S6: Variation in putative transcription factor binding sites in KoRV LTRs**

| Family                                                                     | Samples    |            |           |             |            |              |             |            |              |
|----------------------------------------------------------------------------|------------|------------|-----------|-------------|------------|--------------|-------------|------------|--------------|
|                                                                            | AF151794.2 | AB721500.1 | Pci-SN265 | Pci-QMJ648l | Pci-582119 | Pci-MCZ12454 | Pci-MCZ8574 | Pci-um3435 | Pci-maex1738 |
| Core promoter initiator elements                                           | 1          | 1          | 1         | 1           | 1          | 1            | 1           | 1          | 1            |
| Vertebrate TATA binding protein factor                                     | 1          | 1          | 1         | 1           | 1          | 1            | 1           | 1          | 1            |
| Abdominal-B type homeodomain transcription factors                         | 3          | 3          | 3         | 3           | 3          | 3            | 3           | 3          | 3            |
| MAF and AP1 related factors                                                | 1          | 1          | 1         | 1           | 1          | 1            | 1           | 1          | 1            |
| Bicoid-like homeodomain transcription factors                              | 1          | 1          | 1         | 1           | 1          | 1            | 1           | 1          | 1            |
| POZ domain zinc finger expressed in B-Cells                                | 3          | 3          | 3         | 3           | 3          | 3            | 3           | 3          | 3            |
| Brn-5 POU domain factors                                                   | 2          | 2          | 2         | 2           | 2          | 2            | 2           | 2          | 2            |
| CCAAT binding factors                                                      | 1          | 2          | 1         | 2           | 1          | 1            | 2           | 1          | 1            |
| Calcium-response elements                                                  | 1          | 1          | 1         | 1           | 1          | 1            | 1           | 1          | 1            |
| Cell cycle regulators                                                      | 1          | 1          | 1         | 1           | 1          | 1            | 1           | 1          | 1            |
| Vertebrate caudal related homeodomain protein                              | 2          | 2          | 2         | 2           | 2          | 2            | 2           | 2          | 2            |
| Ccaat/Enhancer Binding Protein                                             | 2          | 2          | 2         | 3           | 2          | 2            | 2           | 2          | 2            |
| Cell cycle regulators: Cell cycle homology element                         | 1          | 1          | 1         | 1           | 1          | 1            | 1           | 1          | 1            |
| CLOX and CLOX homology (CDP) factors                                       | 1          | 1          | 1         | 1           | 1          | 1            | 1           | 1          | 1            |
| CP2-erythrocyte Factor related to drosophila Elf1                          | 0          | 0          | 1         | 0           | 0          | 0            | 1           | 0          | 0            |
| CTCF and BORIS gene family                                                 | 1          | 1          | 1         | 1           | 1          | 1            | 1           | 1          | 1            |
| Cyclin D binding myb-like transcription factor                             | 1          | 1          | 1         | 1           | 1          | 1            | 1           | 1          | 1            |
| E2F-myc activator/cell cycle regulator                                     | 4          | 4          | 4         | 4           | 4          | 4            | 4           | 4          | 4            |
| E-box binding factors                                                      | 2          | 2          | 2         | 2           | 2          | 2            | 2           | 2          | 2            |
| Estrogen response elements                                                 | 2          | 2          | 2         | 2           | 2          | 2            | 2           | 2          | 2            |
| Human and murine ETS1 factors                                              | 6          | 5          | 5         | 5           | 5          | 5            | 5           | 5          | 5            |
| EV11-myeoid transforming protein                                           | 0          | 0          | 0         | 1           | 0          | 0            | 0           | 0          | 1            |
| FAST-1 SMAD interacting proteins                                           | 1          | 1          | 1         | 1           | 1          | 1            | 1           | 1          | 1            |
| Fork head domain factors                                                   | 4          | 5          | 4         | 5           | 4          | 4            | 5           | 4          | 4            |
| Farnesoid X - activated receptor response elements                         | 1          | 1          | 1         | 1           | 1          | 1            | 1           | 1          | 1            |
| Growth factor independence transcriptional repressor                       | 1          | 1          | 1         | 1           | 1          | 1            | 1           | 1          | 1            |
| Glucocorticoid responsive and related element                              | 1          | 1          | 2         | 2           | 1          | 1            | 1           | 1          | 1            |
| Human acute myelogenous leukemia factors                                   | 1          | 1          | 1         | 1           | 1          | 1            | 1           | 1          | 1            |
| Twist subfamily of class B bHLH transcription factors                      | 3          | 2          | 2         | 2           | 2          | 2            | 3           | 2          | 2            |
| Heat shock factors                                                         | 5          | 5          | 5         | 5           | 5          | 5            | 5           | 5          | 5            |
| Vertebrate homologues of enhancer of split complex                         | 3          | 3          | 3         | 3           | 3          | 3            | 3           | 3          | 3            |
| Kruppel-like C2H2 zinc finger factors hypermethylated in cancer            | 1          | 1          | 1         | 1           | 1          | 1            | 1           | 1          | 1            |
| Human muscle-specific Mt binding site                                      | 1          | 1          | 1         | 1           | 1          | 1            | 1           | 1          | 1            |
| Onecut homeodomain factor HNF6                                             | 1          | 1          | 1         | 1           | 1          | 1            | 1           | 1          | 1            |
| HOX - PBX complexes                                                        | 2          | 2          | 2         | 2           | 2          | 2            | 2           | 2          | 2            |
| HOX - MEIS1 heterodimers                                                   | 0          | 0          | 0         | 0           | 0          | 0            | 0           | 0          | 1            |
| Ikaros zinc finger family                                                  | 1          | 1          | 1         | 1           | 1          | 1            | 1           | 1          | 1            |
| Interferon regulatory factors                                              | 1          | 1          | 1         | 1           | 1          | 1            | 1           | 1          | 1            |
| Kruppel like transcription factors                                         | 2          | 2          | 2         | 2           | 2          | 2            | 2           | 2          | 2            |
| LEF1/TCF                                                                   | 2          | 2          | 2         | 2           | 2          | 2            | 2           | 2          | 2            |
| Myc associated zinc fingers                                                | 1          | 1          | 1         | 1           | 1          | 1            | 1           | 1          | 1            |
| MEF3 binding sites                                                         | 1          | 1          | 1         | 1           | 1          | 1            | 1           | 1          | 1            |
| Myc-interacting Zn finger protein 1                                        | 1          | 1          | 1         | 1           | 1          | 1            | 1           | 1          | 1            |
| Cellular and viral myb-like transcriptional regulators                     | 3          | 2          | 3         | 2           | 2          | 3            | 2           | 2          | 2            |
| Myoblast determining factors                                               | 1          | 1          | 1         | 1           | 1          | 1            | 1           | 1          | 1            |
| MYT1 C2HC zinc finger protein                                              | 0          | 0          | 0         | 0           | 0          | 0            | 0           | 0          | 1            |
| Myeloid zinc finger 1 factors                                              | 1          | 1          | 1         | 1           | 1          | 1            | 1           | 1          | 1            |
| NGFI-B response elements, nur subfamily of nuclear receptors               | 1          | 1          | 1         | 1           | 1          | 1            | 1           | 1          | 1            |
| Nuclear factor 1                                                           | 0          | 1          | 1         | 1           | 1          | 1            | 1           | 1          | 1            |
| Nuclear factor of activated T-cells                                        | 1          | 1          | 1         | 1           | 1          | 1            | 1           | 1          | 1            |
| Nuclear factor kappa B/c-rel                                               | 1          | 1          | 1         | 1           | 1          | 1            | 1           | 1          | 1            |
| Octamer binding protein                                                    | 5          | 5          | 5         | 6           | 5          | 5            | 5           | 5          | 1            |
| Odd-skipped related factors                                                | 0          | 1          | 1         | 1           | 1          | 1            | 1           | 1          | 1            |
| OVO homolog-like transcription factors                                     | 1          | 1          | 1         | 1           | 1          | 1            | 1           | 1          | 5            |
| PAR/bZIP family                                                            | 3          | 3          | 3         | 4           | 3          | 3            | 3           | 3          | 3            |
| PAX-4/PAX-6 paired domain binding sites                                    | 1          | 1          | 1         | 1           | 1          | 1            | 1           | 1          | 3            |
| Peroxisome proliferator-activated receptor                                 | 1          | 1          | 1         | 1           | 1          | 1            | 1           | 1          | 1            |
| Pleomorphic adenoma gene                                                   | 3          | 3          | 3         | 3           | 3          | 3            | 3           | 3          | 1            |
| v-ERB and RAR-related orphan receptor alpha                                | 1          | 1          | 1         | 1           | 1          | 1            | 1           | 1          | 2            |
| SWI/SNF related nucleophosphoproteins with a RING finger DNA binding motif | 1          | 1          | 1         | 1           | 1          | 1            | 1           | 1          | 3            |
| RXR heterodimer binding sites                                              | 2          | 2          | 2         | 2           | 2          | 2            | 2           | 2          | 2            |
| Spalt-like transcription factor 2                                          | 1          | 1          | 1         | 1           | 1          | 1            | 1           | 1          | 1            |
| Vertebrate steroidogenic factor                                            | 1          | 1          | 1         | 1           | 1          | 1            | 1           | 1          | 3            |
| Sine oculis (SIX) homeodomain factors                                      | 1          | 1          | 1         | 1           | 1          | 1            | 1           | 1          | 1            |
| Vertebrate SMAD family of transcription factors                            | 0          | 0          | 1         | 0           | 0          | 0            | 1           | 0          | 1            |
| SOX/SRY-sex/testis determining and related HMG box factors                 | 2          | 2          | 2         | 2           | 2          | 2            | 2           | 2          | 2            |
| GC-Box factors SP1/GC                                                      | 1          | 1          | 1         | 1           | 1          | 1            | 1           | 1          | 1            |
| Testis-specific bHLH-Zip transcription factors                             | 1          | 1          | 1         | 1           | 1          | 1            | 1           | 1          | 2            |
| Signal transducer and activator of transcription                           | 2          | 2          | 2         | 2           | 2          | 2            | 2           | 2          | 1            |
| Motif composed of binding sites for pluripotency or stem cell factors      | 3          | 3          | 4         | 3           | 3          | 3            | 3           | 3          | 1            |
| TEA/ATTS DNA binding domain factors                                        | 1          | 1          | 1         | 1           | 1          | 1            | 1           | 1          | 2            |
| X-box binding factors                                                      | 1          | 1          | 1         | 1           | 1          | 1            | 1           | 1          | 3            |
| Y-box binding transcription factors,                                       | 1          | 1          | 1         | 1           | 1          | 1            | 1           | 1          | 1            |
| C2H2 zinc finger transcription factors 2                                   | 1          | 1          | 1         | 1           | 1          | 1            | 1           | 1          | 1            |
| C2H2 zinc finger transcription factors 3                                   | 0          | 0          | 1         | 0           | 0          | 1            | 0           | 0          | 0            |
| C2H2 zinc finger transcription factors 10                                  | 1          | 1          | 1         | 1           | 1          | 1            | 1           | 1          | 1            |
| ZF5 POZ domain zinc finger                                                 | 0          | 1          | 1         | 1           | 0          | 1            | 0           | 0          | 1            |
| Two-handed zinc finger homeodomain transcription factors                   | 2          | 2          | 2         | 2           | 2          | 2            | 2           | 2          | 2            |
| Retroviral CCAAT binding factors                                           | 2          | 2          | 2         | 2           | 2          | 2            | 2           | 2          | 2            |
| Retroviral PolyA Downstream signal                                         | 1          | 1          | 1         | 1           | 1          | 1            | 1           | 1          | 1            |
| Retroviral PolyA signal                                                    | 1          | 1          | 1         | 1           | 1          | 1            | 1           | 1          | 1            |
| Retroviral upstream element                                                | 2          | 2          | 2         | 2           | 2          | 2            | 2           | 2          | 2            |

Grey shading indicates sequences with differing numbers of predicted TFs for a given domain
