# Supplementary material for: Hybridization Capture Reveals Evolution and Conservation across the Entire Koala Retrovirus Genome
Source: PubMed Central journal article supplement (PMC3994108; doi:10.1371/journal.pone.0095633), 2014-04-21
Supplement: pone.0095633.s012.pdf [file pone.0095633.s012.pdf]

Table S7: KoRV flanking sequences common to two or more koalas

| Sequence             | Total | Pci-  |        |        |          |         |        | Pci-     |         | Pci-  |      | Pci- |       | Pci- |      | Pci-  |      |
|----------------------|-------|-------|--------|--------|----------|---------|--------|----------|---------|-------|------|------|-------|------|------|-------|------|
|                      |       | SN265 | QMJ648 | 582119 | MCZ12454 | MCZ8574 | um3435 | maex1738 | SN404(W | SN404 | SN24 | SN34 | SN404 | SN24 | SN34 | SN404 | SN24 |
| ' flanking sequences |       |       |        |        |          |         |        |          |         |       |      |      |       |      |      |       |      |
| PCI -5'Flank-1       | 5     |       | +      |        |          | +       |        | +        |         |       | +    |      | +     |      |      |       |      |
| PCI -5'Flank-2       | 3     | +     | +      |        |          |         |        |          |         | +     |      |      |       |      |      |       |      |
| PCI -5'Flank-3       | 2     |       |        |        |          |         |        |          |         | +     |      | +    |       |      |      |       |      |
| PCI -5'Flank-4       | 2     |       |        |        |          |         |        |          |         | +     |      |      |       |      |      |       |      |
| PCI -5'Flank-5       | 2     |       |        |        |          |         |        |          |         | +     |      |      |       |      |      |       |      |
| PCI -5'Flank-6       | 2     |       |        |        |          |         |        |          |         |       |      | +    |       | +    |      |       |      |
| PCI -5'Flank-7       | 2     |       |        | +      |          |         |        |          |         |       |      | +    |       |      |      |       |      |
| PCI -5'Flank-8       | 2     |       |        |        |          |         |        |          |         |       |      | +    |       |      |      |       |      |
| PCI -5'Flank-9       | 2     |       |        |        |          |         |        |          |         |       |      | +    |       |      |      |       |      |
| PCI -5'Flank-10      | 3     | +     | +      |        |          |         |        |          |         |       |      | +    |       |      |      |       |      |
| PCI -5'Flank-11      | 3     | +     | +      |        |          |         |        |          |         |       |      | +    |       | +    |      |       |      |
| PCI -5'Flank-12      | 3     | +     | +      |        |          |         |        |          |         |       |      |      |       |      |      |       |      |
| PCI -5'Flank-13      | 2     |       |        |        |          |         |        |          |         |       |      | +    |       |      |      |       |      |
| PCI -5'Flank-14      | 2     |       |        |        |          |         |        |          |         |       |      | +    |       |      |      |       |      |
| PCI -5'Flank-15      | 2     | +     |        |        |          |         |        |          |         |       |      | +    |       |      |      |       |      |
| PCI -5'Flank-16      | 2     | +     |        |        |          |         |        |          |         |       |      | +    |       |      |      |       |      |
| PCI -5'Flank-17      | 2     | +     |        |        |          |         |        |          |         |       |      | +    |       |      |      |       |      |
| PCI -5'Flank-18      | 2     |       |        |        |          |         |        |          |         |       |      |      |       |      |      |       | +    |
| PCI -5'Flank-19      | 2     | +     | +      |        |          |         |        |          |         |       |      |      |       |      |      |       |      |
| PCI -5'Flank-20      | 2     | +     |        |        |          |         |        |          |         |       |      |      |       |      |      |       |      |
| PCI -5'Flank-21      | 2     | +     | +      |        |          |         |        |          |         |       |      |      |       |      |      |       |      |
| PCI -5'Flank-22      | 2     | +     |        |        |          |         |        |          |         |       |      |      |       |      |      |       |      |
| PCI -5'Flank-23      | 2     | +     |        |        |          |         |        |          |         |       |      |      |       |      |      |       |      |
| PCI -5'Flank-24      | 4     | +     |        |        |          |         |        |          |         |       |      |      |       |      |      |       |      |
| PCI -5'Flank-25      | 2     |       |        |        |          |         |        |          |         |       |      |      |       |      |      |       |      |
| PCI -5'Flank-26      | 3     | +     | +      |        |          |         |        |          |         |       |      |      |       |      |      |       |      |
| PCI -5'Flank-27      | 3     | +     | +      |        |          |         |        |          |         |       |      |      |       |      |      |       |      |
| PCI -5'Flank-28      | 2     | +     |        |        |          |         |        |          |         |       |      |      |       |      |      |       |      |
| PCI -5'Flank-29      | 2     | +     |        |        |          |         |        |          |         |       |      |      |       |      |      |       |      |
| PCI -5'Flank-30      | 2     | +     |        |        |          |         |        |          |         |       |      |      |       |      |      |       |      |
| PCI -5'Flank-31      | 2     |       |        |        |          |         |        |          |         |       |      |      |       |      |      |       |      |
| PCI -5'Flank-32      | 2     |       |        |        |          |         |        |          |         |       |      |      |       |      |      |       |      |
| ' flanking sequences |       |       |        |        |          |         |        |          |         |       |      |      |       |      |      |       |      |
| PCI -3'Flank-1       | 4     | +     | +      |        |          |         |        |          |         |       |      |      |       |      |      |       |      |
| PCI -3'Flank-2       | 2     | +     |        |        |          |         |        |          |         |       |      |      |       |      |      |       |      |
| PCI -3'Flank-3       | 5     | +     | +      |        |          |         |        |          |         |       |      |      |       |      |      |       |      |
| PCI -3'Flank-4       | 3     | +     | +      |        |          |         |        |          |         |       |      |      |       |      |      |       |      |
| PCI -3'Flank-5       | 2     | +     |        |        |          |         |        |          |         |       |      |      |       |      |      |       |      |
| PCI -3'Flank-6       | 2     | +     |        |        |          |         |        |          |         |       |      |      |       |      |      |       |      |
| PCI -3'Flank-7       | 2     | +     |        |        |          |         |        |          |         |       |      |      |       |      |      |       |      |
| PCI -3'Flank-8       | 3     |       |        |        |          |         |        |          |         |       |      |      |       |      |      |       |      |
| PCI -3'Flank-9       | 2     | +     |        |        |          |         |        |          |         |       |      |      |       |      |      |       |      |
| PCI -3'Flank-10      | 4     | +     |        |        |          |         |        |          |         |       |      |      |       |      |      |       |      |
| PCI -3'Flank-11      | 2     | +     | +      |        |          |         |        |          |         |       |      |      |       |      |      |       |      |
| PCI -3'Flank-12      | 5     | +     | +      |        |          |         |        |          |         |       |      |      |       |      |      |       |      |
| PCI -3'Flank-13      | 2     | +     | +      |        |          |         |        |          |         |       |      |      |       |      |      |       |      |
| PCI -3'Flank-14      | 3     | +     |        |        |          |         |        |          |         |       |      |      |       |      |      |       |      |
| PCI -3'Flank-15      | 5     | +     | +      |        |          |         |        |          |         |       |      |      |       |      |      |       |      |
| PCI -3'Flank-16      | 4     | +     | +      |        |          |         |        |          |         |       |      |      |       |      |      |       |      |
| PCI -3'Flank-17      | 5     | +     |        |        |          |         |        |          |         |       |      |      |       |      |      |       |      |

+ Light grey represents insertion sites found in two koalas  
 + Middle grey represents insertion sites found in 3 koalas  
 + Dark grey represents insertion sites found in four or more koalas
